# Supplementary material for: Interplay between bulk self-assembly, interfacial and foaming properties in a catanionic surfactant mixture of varying composition
Source: Royal Society of Chemistry journal article supplement (doi:10.1039/c7sm01601h), 2017-01-01
Supplement: c7sm01601h1.pdf [file c7sm01601h1.pdf]

## Supplementary Information

*Interplay between Bulk Self-Assembly, Interfacial and Foaming Properties in a Catanionic Surfactant Mixture of Varying Composition*, J. Ferreira, A. Mikhailovskaia, A. Chenneviere, F. Restagno, F. Cousin, F. Muller, J. Degrouard, A. Salonen, E. F. Marques.

### 1. DLS and zeta potential measurements

The catanionic solutions were analyzed with a Malvern ZetaSizer Nano ZS. For particle size determination, 1 mL aliquots of solution were placed in disposable polystyrene covets and analyzed at 27 °C. For zeta potential determination, 1 mL aliquots of solution were placed in disposable capillary polycarbonate cells equipped with gold-coated electrodes. Samples were equilibrated for 2 min before analysis and 5 runs per sample taken.

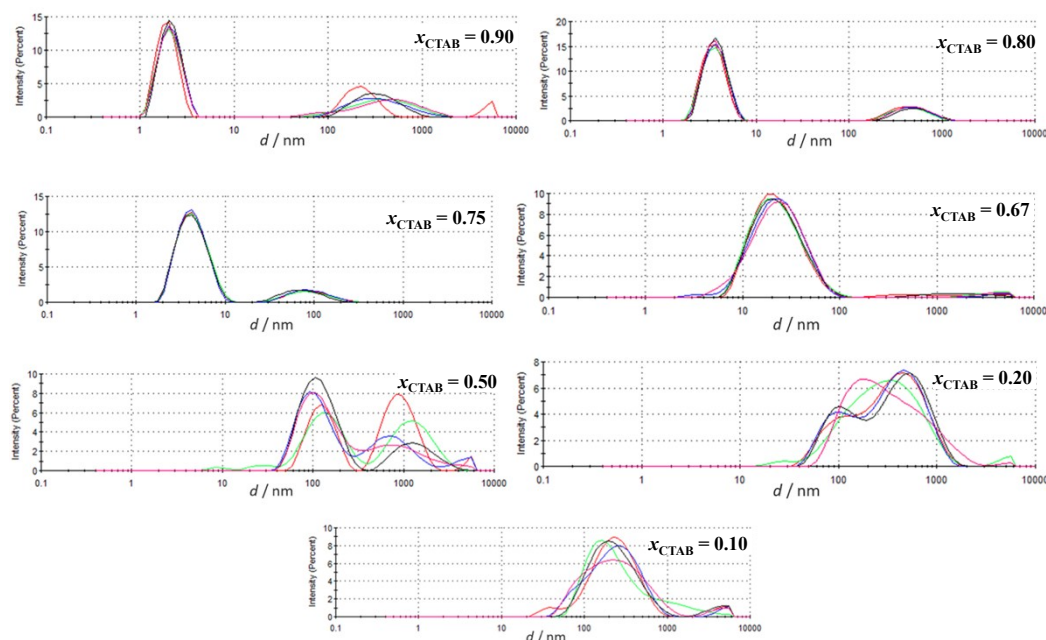

**Figure S1.** DLS intensity vs. size curves for different  $x_{CTAB}$ .

### 2. Viscosity

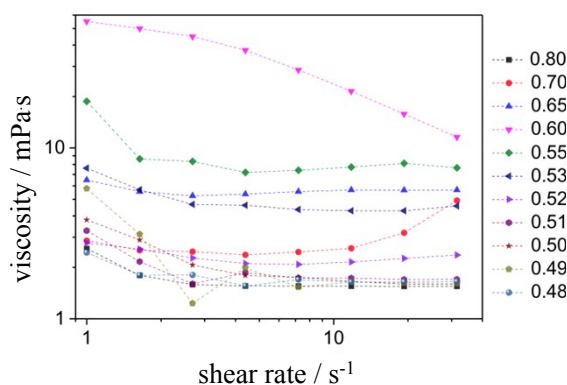

**Figure S2.** Viscosity as a function of the shear rate for different  $x_{CTAB}$  samples. The vertical axis is represented in logarithmic scale for convenience

### 3. Calculation of $\beta$ from surface tension data

The  $\beta$  parameter is related to the enthalpy of mixing,  $\Delta_{\text{mix}}H$ , through

$$\Delta_{\text{mix}}H = n\beta RTx_1x_2 \quad (\text{eq. S1})$$

$\beta$  can be calculated from surface tension data for each  $x_{\text{CTAB}}$  value from the expression:

$$\beta = \frac{\ln\left(\frac{x_2 \text{cmc}_{12}}{x_2^m \text{cmc}_2}\right)}{(1-x_1^m)^2} = \frac{\ln\left(\frac{x_1 \text{cmc}_{12}}{x_1^m \text{cmc}_1}\right)}{(x_2^m)^2} \quad (\text{eq. S2})$$

where  $\text{cmc}_{12}$  is the  $\text{cmc}$  of the mixture and  $x_1^m$  and  $x_2^m$  are the molar fractions of surfactant 1 (CTAB) and surfactant 2 (SOSO) in the mixed micelles. They can be calculated from:

$$x_1^m = \frac{x_1 \cdot \text{cmc}_2}{x_1 \cdot \text{cmc}_2 + x_2 \cdot \text{cmc}_1}; x_2^m = \frac{x_2 \cdot \text{cmc}_1}{x_1 \cdot \text{cmc}_2 + x_2 \cdot \text{cmc}_1} \quad (\text{eq. S3})$$

### 4. SANS spectra of foams

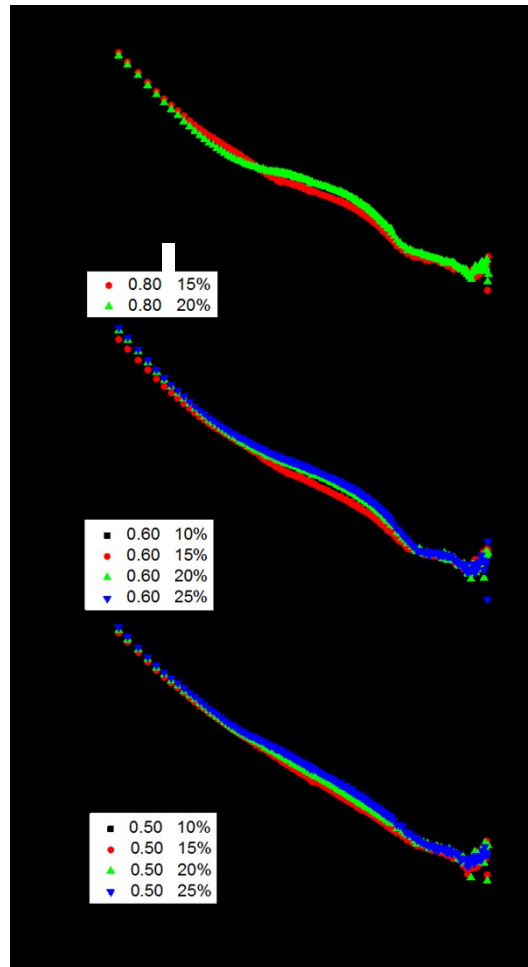

**Figure S4.** SANS spectra for foams generated at 15% and 20% for sample 0.800 (A) and at 10%, 15%, 20% and 25% for samples 0.600 (B) and 0.500 (C).
